# Supplementary material
Source: PubMed Central journal article supplement (PMC1887585)

**A**

Correlation between anxiety ratings  
when the real and rubber hand is  
threatened

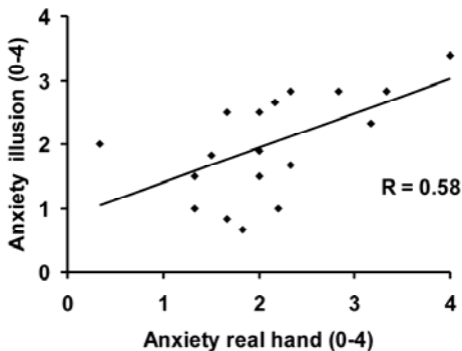**B**

Correlation between vividness  
and anxiety

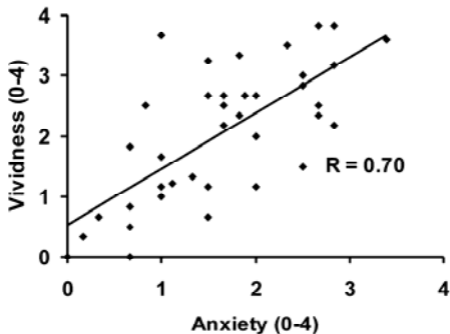

Supplement: pnas_0610011104_2.pdf [file pnas_0610011104_2.pdf]
