# Supplementary material
Source: PubMed Central journal article supplement (PMC1887585)

Correlation between illusion activity and anxiety response

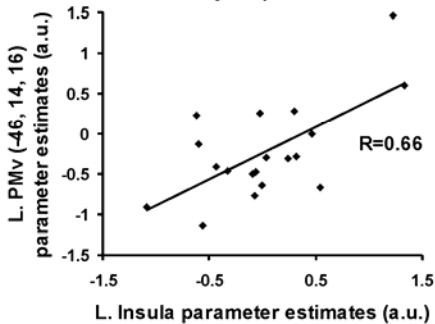

Correlation between illusion activity and anxiety response

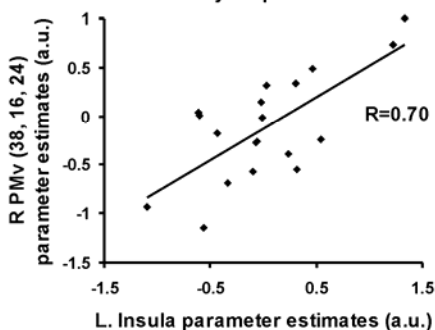

Correlation between illusion activity and anxiety response

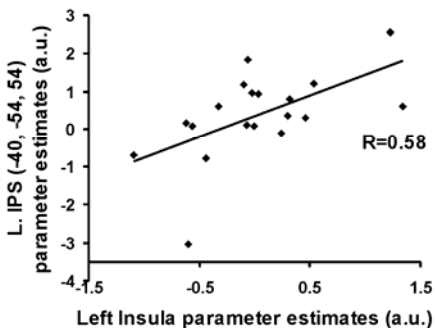

Correlation between illusion activity and anxiety response

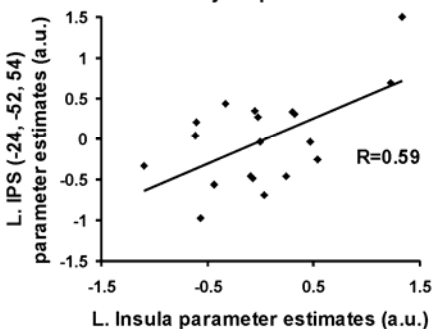

Supplement: pnas_0610011104_4.pdf [file pnas_0610011104_4.pdf]
