# Supplementary material
Source: PubMed Central journal article supplement (PMC1887585)
Supplement: pnas_0610011104_8.pdf [file pnas_0610011104_8.pdf]

**TABLE**

| <b>Anatomical region</b>                                           | <b>X</b> | <b>Y</b> | <b>Z</b> | <b>Peak T value<br/>(<math>p &lt; 0.05</math> corrected)</b> |
|--------------------------------------------------------------------|----------|----------|----------|--------------------------------------------------------------|
| <b>Main effect of threatening the hand</b>                         |          |          |          |                                                              |
| L. insula and frontal operculum                                    | -52      | 14       | -1       | 8.38* <sup>†</sup>                                           |
| R. insula and frontal operculum                                    | 52       | 24       | 0        | 7.49* <sup>†</sup>                                           |
| Pre-supplementary motor area                                       | 6        | 14       | 62       | 5.48* <sup>†</sup>                                           |
| R. dorsal premotor cortex                                          | 40       | 0        | 56       | 5.94 <sup>†</sup>                                            |
| R. superior parietal cortex                                        | 20       | -58      | 70       | 5.60 <sup>†</sup>                                            |
| L. superior parietal cortex                                        | -34      | -50      | 66       | 4.48 <sup>†</sup>                                            |
| L. inferior parietal cortex                                        | -60      | -42      | 28       | 5.14 <sup>†</sup>                                            |
| R. inferior parietal cortex                                        | 60       | -34      | 42       | 5.30 <sup>†</sup>                                            |
| L. extrastriate cortex                                             | -50      | -76      | 14       | 5.61 <sup>†</sup>                                            |
| R. extrastriate cortex                                             | 52       | -72      | 12       | 6.07 <sup>†</sup>                                            |
| <b>Interaction between threat and ownership</b>                    |          |          |          |                                                              |
| Pre-supplementary motor area                                       | -4       | 2        | 74       | 5.13*                                                        |
| <b>Correlation between increase in anxiety and threat response</b> |          |          |          |                                                              |
| L. insula and frontal operculum                                    | -46      | 12       | 6        | 6.29* <sup>†</sup>                                           |
| R. anterior cingulate cortex                                       | 2        | 10       | 42       | 3.61*                                                        |
| <b>Correlation between ownership and threat response</b>           |          |          |          |                                                              |
| L. insula                                                          | -42      | 20       | 10       | 3.63*                                                        |
| R. insula                                                          | 40       | 28       | 6        | 3.78*                                                        |
| L. anterior cingulate cortex                                       | -10      | -4       | 40       | 5.65*                                                        |
| R. anterior cingulate cortex                                       | 8        | -4       | 36       | 4.48*                                                        |

(\*)  $p < 0.05$  after small volume corrections based on an *a priori* hypothesis (cluster-level; see Methods for details).

(<sup>†</sup>)  $p < 0.05$  after corrections for multiple comparisons in the whole brain (cluster-level).
