# Supplementary material
Source: PubMed Central journal article supplement (PMC1887585)

**A**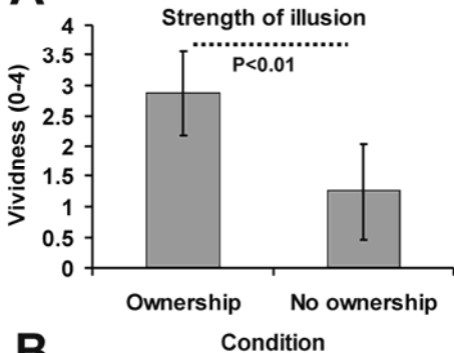**B**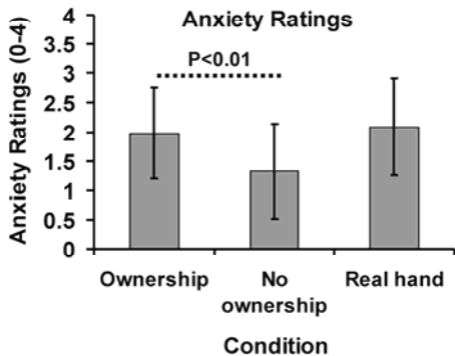

Supplement: pnas_0610011104_1.pdf [file pnas_0610011104_1.pdf]

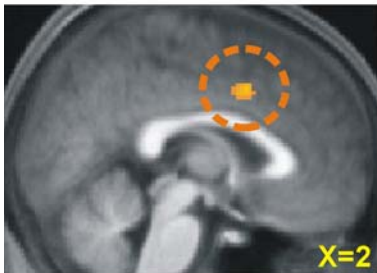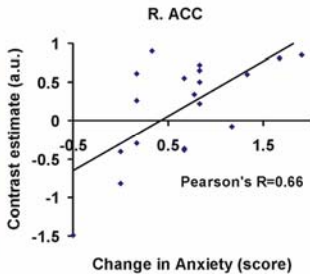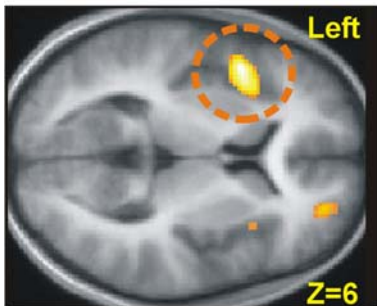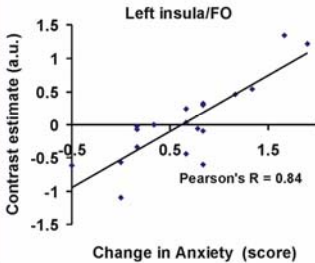

Supplement: pnas_0610011104_3.pdf [file pnas_0610011104_3.pdf]

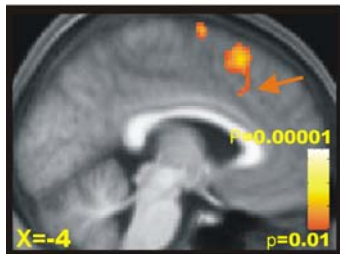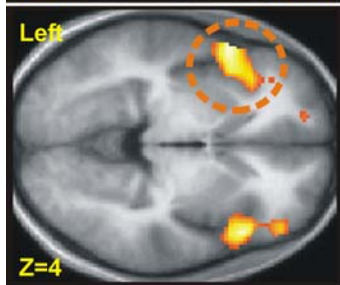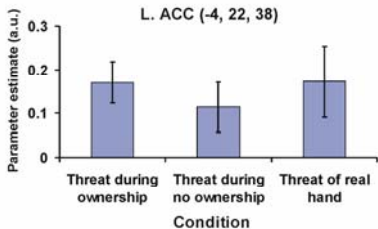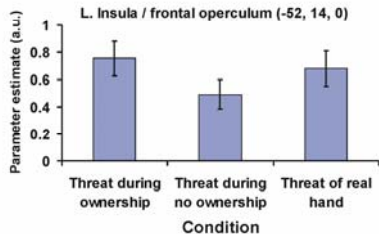

Supplement: pnas_0610011104_5.pdf [file pnas_0610011104_5.pdf]

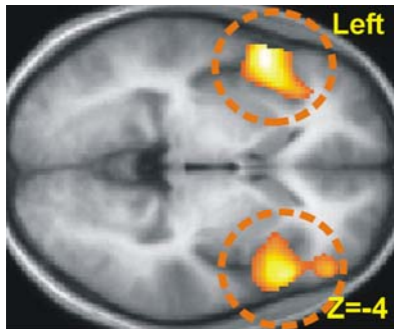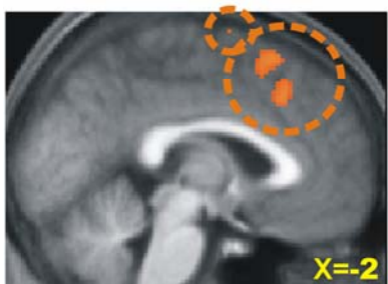

Supplement: pnas_0610011104_6.pdf [file pnas_0610011104_6.pdf]

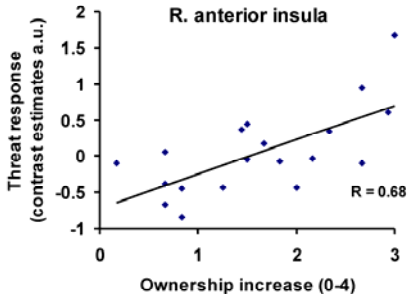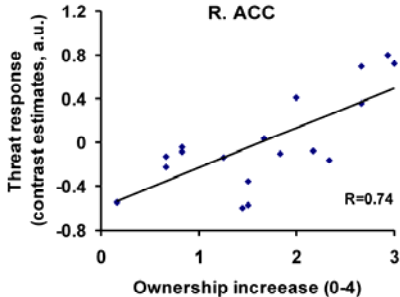

Supplement: pnas_0610011104_7.pdf [file pnas_0610011104_7.pdf]
